## Observational Gait Analysis After Stroke

### eAppendix 2.

Experts' Item Relevance and Tool Comprehensiveness Assessment<sup>a</sup>

| Expert<br>GAIT |   |   | Expert<br>HGAF |   |   | Expert<br>NYMSOGA                                                 |   |                    | Expert<br>RVGA |          |   | Expert<br>WGS |   |   |
|----------------|---|---|----------------|---|---|-------------------------------------------------------------------|---|--------------------|----------------|----------|---|---------------|---|---|
| Item           | A | B | Item           | A | B | Item                                                              | A | B                  | Item           | A        | B | Item          | A | B |
| 1              | 2 | 2 | Section A1     | 2 | 2 | 1                                                                 | 3 | 2                  | 1              | 2        | 2 | 1             | 4 | 4 |
| 2              | 2 | 2 | Section A2     | 2 | 2 | 2                                                                 | 3 | 2                  | 2              | 2        | 2 | 2             | 4 | 4 |
| 3              | 3 | 2 | Section A3     | 4 | 4 | 3                                                                 | 3 | 2                  | 3              | 3        | 2 | 3             | 3 | 4 |
| 4              | 2 | 2 | Section A4     | 3 | 4 | 4                                                                 | 3 | 4                  | 4              | 3        | 2 | 4             | 4 | 4 |
| 5              | 3 | 2 | Section A5     | 3 | 4 | 5                                                                 | 3 | 4                  | 5              | 3        | 4 | 5             | 3 | 3 |
| 6              | 3 | 2 | Section A6     | 3 | 2 | 6                                                                 | 3 | 4                  | 6              | 4        | 4 | 6             | 4 | 3 |
| 7              | 4 | 4 | Section B1     | 4 | 4 | 7                                                                 | 3 | 4                  | 7              | 4        | 4 | 7             | 3 | 4 |
| 8              | 4 | 4 | Section B2     | 4 | 4 | 8                                                                 | 3 | 4                  | 8              | 4        | 4 | 8             | 3 | 3 |
| 9              | 4 | 4 | Section B3     | 4 | 4 | 9                                                                 | 3 | 4                  | 9A             | 4        | 4 | 9             | 3 | 4 |
| 10             | 3 | 3 | Section C1     | 4 | 4 | 10                                                                | 3 | 4                  | 9B             | 4        | 4 | 10            | 4 | 4 |
| 11A            | 4 | 4 | Section C2     | 4 | 4 | 11                                                                | 3 | 4                  | 10A            | 4        | 4 | 11            | 4 | 4 |
| 11B            | 4 | 4 | Section C3     | 4 | 4 | 12                                                                | 3 | 4                  | 10B            | 4        | 4 | 12            | 4 | 4 |
| 12A            | 4 | 4 | Section C4     | 4 | 4 | 13                                                                | 3 | 4                  | 11A            | 4        | 4 | 13            | 4 | 4 |
| 12B            | 4 | 4 | Section C5     | 4 | 4 | 14                                                                | 3 | 3                  | 11B            | 3        | 4 | 14            | 4 | 4 |
| 13A            | 4 | 4 | Section C6     | 4 | 4 | 15                                                                | 3 | 4                  | 12             | 4        | 4 |               |   |   |
| 13B            | 4 | 4 | Section C7     | 4 | 4 | 16                                                                | 3 | 2                  | 13             | 4        | 4 |               |   |   |
| 13C            | 4 | 4 | Section C8     | 4 | 4 | 17                                                                | 3 | 3                  | 14             | 3        | 2 |               |   |   |
| 13D            | 4 | 4 | Section C9     | 4 | 4 |                                                                   |   |                    | 15             | 3        | 2 |               |   |   |
| 14             | 4 | 4 |                |   |   |                                                                   |   |                    | 16             | 4        | 4 |               |   |   |
| 15A            | 4 | 4 |                |   |   |                                                                   |   |                    | 17             | 4        | 4 |               |   |   |
| 15B            | 4 | 4 |                |   |   |                                                                   |   |                    | 18             | 4        | 4 |               |   |   |
| 16             | 4 | 4 |                |   |   |                                                                   |   |                    | 19             | 4        | 4 |               |   |   |
| 17             | 4 | 4 |                |   |   |                                                                   |   |                    | 20             | 4        | 4 |               |   |   |
| 18             | 2 | 3 |                |   |   |                                                                   |   |                    |                |          |   |               |   |   |
| 19             | 3 | 2 |                |   |   |                                                                   |   |                    |                |          |   |               |   |   |
| 20             | 3 | 2 |                |   |   | <b>Presence of<br/>comprehensiveness<br/>minimum requirements</b> |   | <b>Expert Tool</b> |                | <b>A</b> |   | <b>B</b>      |   |   |
| 21             | 4 | 4 |                |   |   |                                                                   |   |                    |                |          |   |               |   |   |
| 22             | 3 | 3 |                |   |   |                                                                   |   | GAIT               |                | Yes      |   | Yes           |   |   |
| 23             | 4 | 4 |                |   |   |                                                                   |   | HGAF               |                | Yes      |   | Yes           |   |   |
| 24             | 3 | 4 |                |   |   |                                                                   |   | NYMSOGA            |                | No       |   | No            |   |   |
| 25             | 3 | 3 |                |   |   |                                                                   |   | RVGA               |                | Yes      |   | Yes           |   |   |
| 26             | 4 | 4 |                |   |   |                                                                   |   | WGS                |                | No       |   | No            |   |   |
| 27             | 3 | 4 |                |   |   |                                                                   |   |                    |                |          |   |               |   |   |
| 28             | 3 | 4 |                |   |   |                                                                   |   |                    |                |          |   |               |   |   |
| 29             | 4 | 4 |                |   |   |                                                                   |   |                    |                |          |   |               |   |   |
| 30             | 3 | 4 |                |   |   |                                                                   |   |                    |                |          |   |               |   |   |
| 31             | 2 | 3 |                |   |   |                                                                   |   |                    |                |          |   |               |   |   |

<sup>a</sup> Evaluations in the appendix were performed in accordance with definition and criteria provided in Appendix 1. GAIT=Gait Assessment and Intervention Tool, HGAF=Hemiplegic Gait Analysis Form, NYMSOGA=New York Medical School Orthotic Gait Analysis, RVGA=Rivermead Visual Gait Assessment, WGS=Wisconsin Gait Scale.
